# Supplementary material for: Bioavailability of Sulforaphane Following Ingestion of Glucoraphanin-Rich Broccoli Sprout and Seed Extracts with Active Myrosinase: A Pilot Study of the Effects of Proton Pump Inhibitor Administration
Source: MDPI journal article supplement (doi:10.3390/nu11071489), 2019-06-29

## **SUPPORTING INFORMATION:**

### **Bioavailability of sulforaphane following ingestion of glucoraphanin-rich broccoli sprout and seed extracts with active myrosinase: A pilot study of the effects of proton pump inhibitor administration**

Jed W. Fahey<sup>1,2,3,4,\*</sup>, Kristina L. Wade<sup>1,3</sup>, Katherine K. Stephenson<sup>1,3</sup>, Anita A. Panjwani<sup>1,4</sup>, Hua Liu<sup>1,3</sup>, Grace Cornblatt<sup>5</sup>, Brian S. Cornblatt<sup>5</sup>, Stacy L. Ownby<sup>5</sup>, Edward Fuchs<sup>2</sup>, Walter David Holtzclaw<sup>1,3</sup>, Lawrence J. Cheskin<sup>6,‡</sup>

<sup>1</sup> Cullman Chemoprotection Center, Johns Hopkins University, Baltimore, Maryland, USA

<sup>2</sup> Johns Hopkins University School of Medicine, Department of Medicine, Division of Clinical Pharmacology, Baltimore, Maryland, USA

<sup>3</sup> Johns Hopkins University School of Medicine, Department of Pharmacology and Molecular Sciences, Baltimore, Maryland, USA

<sup>4</sup> Johns Hopkins University Bloomberg School of Public Health, Department of International Health, Center for Human Nutrition, Baltimore, Maryland, USA

<sup>5</sup> Nutramax Laboratories Consumer Care, Inc., Edgewood, Maryland, USA

<sup>6</sup> Johns Hopkins University Bloomberg School of Public Health, Department of Health Behavior and Society, Baltimore, Maryland, USA

‡ Current Address: George Mason University, Department of Nutrition and Food Studies

\*Address for correspondence: Dr. Jed W. Fahey, Director, Cullman Chemoprotection Center, Johns Hopkins University, 855 N. Wolfe St, Suite 625, Baltimore, Maryland, USA 21205; [jfahey@jhmi.edu](mailto:jfahey@jhmi.edu)

## **Supplementary Results and Discussion.**

An evaluation of any specific gene (e.g. NQO1, which encodes for a prototypical detoxification and cytoprotective enzyme) must be tempered by knowledge that only a single dose was given and gene effects were evaluated a full 24 h later in systemic blood (PBMCs). This would not have permitted us to carefully inspect or query the temporal induction or inhibition events that would be expected to occur within a much shorter time period following the dose.

A most intriguing study appeared while this investigation was underway [1]. These investigators examined a few of the same biomarkers and anthropometric factors that we report upon herein and although not directly comparable (e.g. measured in plasma rather than in PBMCs, and a chronic exposure study) they showed significant reduction in IL-6 and CRP in overweight subjects while consuming BSE with active myrosinase.

## **Supplementary References**

1. López-Chillón, M.T.; Carazo-Díaz, C.; Prieto-Merino, D.; Zafrilla, P.; Moreno, D.A.; Villaño, D. Effect of long term consumption of broccoli sprouts on inflammatory markers in overweight subjects. *Clin. Nutr.* **2019**, *38*, 745-752.

**Table S1.** Pilot Phase demographics and results. BSE supplement dose = 211.2  $\mu$ mol glucoraphanin. Numbers in *red italics* have been censored from any further treatment of the data (and are not included in column-averages in this table), due to apparent incomplete urine collection.

| Participant | Sex | Race     | Age  | BMI       | Excretion reported as $\mu$ mol and (% of dose)) |                     |                      |
|-------------|-----|----------|------|-----------|--------------------------------------------------|---------------------|----------------------|
|             |     |          |      |           | 8 hr                                             | 16 hr               | Total (8+16)         |
| 01          | F   | Cauc     | 40   | 24.0      | 39.31 (25.6%)                                    | 19.19 (3.2%)        | 58.50 (28.8%)        |
| 02          | F   | Cauc     | 34   | 18.1      | 56.58 (26.8%)                                    | 17.80 (8.4%)        | 74.38 (35.2%)        |
| 03          | F   | AA       | 27   | 27.3      | 25.86 (12.2%)                                    | 18.67 (8.8%)        | 44.53 (21.1%)        |
| 04          | F   | AA       | 40   | 24.7      | 38.53 (18.2%)                                    | 10.73 (5.1%)        | 49.26 (23.3%)        |
| 05          | M   | Cauc     | 56   | No Report | 64.14 (30.4%)                                    | 30.91 (14.6%)       | 95.05 (45.0%)        |
| 06          | M   | AA       | 44   | No Report | 40.33 (19.1%)                                    | 19.77 (9.4%)        | 60.10 (28.5%)        |
| 07          | M   | Cauc     | 49   | 35.6      | 13.87 (6.6%)                                     | 22.15 (10.5%)       | 36.02 (17.1%)        |
| 08          | F   | Cauc     | 69   | 20.8      | 25.21 (11.9%)                                    | 26.29 (12.4%)       | 51.50 (24.4%)        |
| 09          | F   | AA       | 53   | 29.4      | 68.43 (32.4%)                                    | 19.55 (9.3%)        | 87.98 (41.7%)        |
| 10          | M   | AA       | 47   | 37.4      | 54.09 (25.6%)                                    | 6.83 (3.2%)         | 60.92 (28.8%)        |
| 11          | F   | Cauc     | 60   | 23.8      | 70.95 (33.6%)                                    | 26.92 (12.7%)       | 97.87 (46.3%)        |
| 12          | F   | Cauc     | 54   | 25.8      | 68.11 (32.2%)                                    | *15.76 (7.5%)       | 83.87 (39.7%)        |
| 13          | F   | AA       | 32   | 29.2      | 53.84 (25.5%)                                    | 14.41 (6.8%)        | 68.25 (32.2%)        |
| 14          | M   | Cauc     | 31   | 27.4      | 90.23 (42.7%)                                    | 18.12 (8.6%)        | 108.35 (51.3%)       |
| 15          | F   | AA       | 42   | 31.3      | 76.66 (36.6%)                                    | 18.05 (8.5%)        | 94.71 (44.8%)        |
| 16          | F   | Asian    | 24   | 22.0      | 38.99 (18.5%)                                    | 16.11 (7.6%)        | 55.10 (26.1%)        |
| 17          | F   | Cauc     | 29   | 21.8      | 49.69 (23.5%)                                    | 36.17 (17.1%)       | 85.86 (40.7%)        |
| 18          | F   | Asian    | 29   | 20.1      | 75.19 (35.6%)                                    | 21.32 (10.1%)       | 96.51 (45.7%)        |
| 19          | F   | Asian    | 33   | 19.3      | 52.17 (24.7%)                                    | 13.33 (6.3%)        | 65.50 (31.0%)        |
| 20**        | M   | Asian    | 38   | 20.9      | <i>38.76 (18.4%)</i>                             | <i>19.31 (9.1%)</i> | <i>58.07 (27.5%)</i> |
| Average     | 70% | 45:35:20 | 41.6 | 25.5      | 52.7 $\pm$ 19.4                                  | 19.6 $\pm$ 6.7      | 72.3 $\pm$ 20.5      |
|             | F   | Ca:AA:As |      |           | (25.4% $\pm$ 9.1%)                               | (9.0% $\pm$ 3.4%)   | (34.3% $\pm$ 9.7%)   |

\*\*\*

\*incomplete 16 hour urine collection, but values included in further calculations.

\*\*high baseline invalidates data.

\*\*\*45% Cauc, 35% AA, 20% Asian

**Table S2.** PPI Phase demographics. BSE supplement dose  $\approx$  370  $\mu$ mol glucoraphanin.

| Participant | Sex | Race             | Age (yrs) | Weight (kg) | Height (m) | BMI   |
|-------------|-----|------------------|-----------|-------------|------------|-------|
| 1           | m   | Latino           | 31.5      | 78.00       | 1.78       | 24.62 |
| 2           | m   | White/Hispanic   | 26.5      | 65.77       | 1.72       | 22.29 |
| 3           | f   | Asian            | 29.8      | 52.16       | 1.50       | 23.28 |
| 4           | f   | African American | 66.6      | 86.18       | 1.67       | 30.95 |
| 5           | m   | Hispanic         | 29.5      | 77.11       | 1.77       | 24.70 |
| 6           | f   | Asian            | 28.5      | 42.64       | 1.56       | 17.52 |
| 7           | f   | African American | 48.7      | 69.85       | 1.57       | 28.32 |
| 8           | f   | Indian           | 22.7      | 58.97       | 1.50       | 26.31 |
| 9           | m   | Caucasian        | 28.7      | 79.38       | 1.82       | 24.07 |
| 10          | f   | Caucasian/Asian  | 25.2      | 62.14       | 1.57       | 25.19 |
| 11          | f   | Hispanic         | 46.0      | 73.94       | 1.60       | 29.06 |
| 12          | m   | Caucasian        | 28.2      | 73.30       | 1.77       | 23.40 |
| 13          | m   | Caucasian        | 31.8      | 70.31       | 1.74       | 23.16 |
| 14          | m   | African American | 28.2      | 79.38       | 1.78       | 25.08 |
| 15          | f   | Asian            | 25.2      | 55.79       | 1.60       | 21.93 |
| 16          | m   | Asian            | 41.7      | 81.65       | 1.74       | 26.90 |

**Table S3.** Gene expression loadings by component after averaging triplicate determinations made at the first and second post-intervention blood draws, compared to those made at baseline. Bolded data represent gene expressions that load negatively (<0.30) or positively (>0.30) on a component. Total variability explained by three components = 70%. An anti-inflammatory gene's contributions (IL-10) group strongly in two components. The contributions of four genes (HSP27, NQO1, GCLC, s1c7a11) were unexplained by these components.

| Gene                    | Principal components (eigenvectors) |                          |                          | Unexplained    |
|-------------------------|-------------------------------------|--------------------------|--------------------------|----------------|
|                         | <sup>1</sup> Component 1            | <sup>2</sup> Component 2 | <sup>3</sup> Component 3 |                |
| % variability explained | 32%                                 | 26%                      | 12%                      |                |
| IL-6                    | <b>0.4139</b>                       | -0.0433                  | -0.0273                  | 0.08294        |
| IL-8                    | <b>0.4317</b>                       | -0.006                   | -0.0586                  | 0.02140        |
| IL-10                   | <b>0.3049</b>                       | -0.1431                  | <b>0.3213</b>            | 0.12980        |
| Cox2                    | <b>0.4291</b>                       | -0.0331                  | -0.0034                  | 0.03108        |
| NQO1                    | -0.0795                             | 0.1842                   | 0.1329                   | <b>0.62480</b> |
| HO-1                    | 0.0058                              | <b>0.3666</b>            | -0.0841                  | <b>0.45530</b> |
| GCLC                    | -0.065                              | 0.2273                   | 0.2157                   | <b>0.33720</b> |
| GCLM                    | -0.0341                             | <b>0.4158</b>            | -0.0565                  | 0.23880        |
| IL-1 $\beta$            | <b>0.4279</b>                       | 0.0064                   | -0.0728                  | 0.03920        |
| HSP70                   | -0.03                               | <b>0.3384</b>            | 0.0343                   | <b>0.39280</b> |
| HSP27                   | 0.0536                              | 0.1658                   | 0.1779                   | <b>0.61820</b> |
| IL-2                    | -0.0774                             | -0.104                   | <b>0.4555</b>            | 0.25350        |
| SOD2                    | <b>0.387</b>                        | 0.1905                   | 0.0745                   | 0.04851        |
| Catalase                | -0.0085                             | 0.0299                   | <b>0.3865</b>            | <b>0.33330</b> |
| HDAC3                   | -0.0166                             | 0.0371                   | <b>0.4417</b>            | 0.12200        |
| SLC7A11                 | -0.0027                             | 0.2161                   | 0.2353                   | <b>0.35240</b> |
| AKR1c1                  | 0.0403                              | <b>0.3313</b>            | -0.0046                  | <b>0.49010</b> |
| IFN $\gamma$            | 0.0926                              | <b>0.3282</b>            | 0.0017                   | <b>0.47260</b> |
| AKR1b10                 | -0.0156                             | <b>0.355</b>             | -0.1193                  | <b>0.50130</b> |
| SMPD1                   | 0.0042                              | -0.0455                  | <b>0.391</b>             | <b>0.42730</b> |

<sup>1</sup>Component 1: IL-6, IL-8, (IL-10), Cox2, IL-1 $\beta$ , SOD2  
<sup>2</sup>Component 2: HO-1, GCLM, AKR1c1, IFN $\gamma$ , AKR1b10, HSP70  
<sup>3</sup>Component 3: (IL-10), IL-2, Catalase, HDAC3, SMPD1

**Figure S1.** Twenty-four hour SF metabolite excretion following a single oral dose of BSE containing active myrosinase: The first 8 h. (■), and the next 16 h. (■).

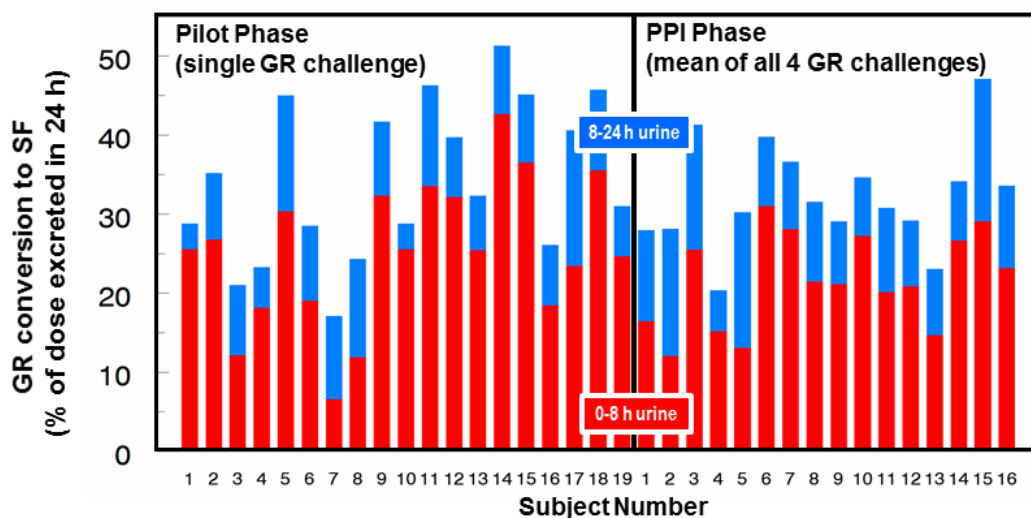

**Figure S2.** Relationship between self-identified ethnicity and bioavailability. Excretion of sulforaphane (SF) metabolites following a single oral dose of BSE containing glucoraphanin (GR) and active myrosinase.

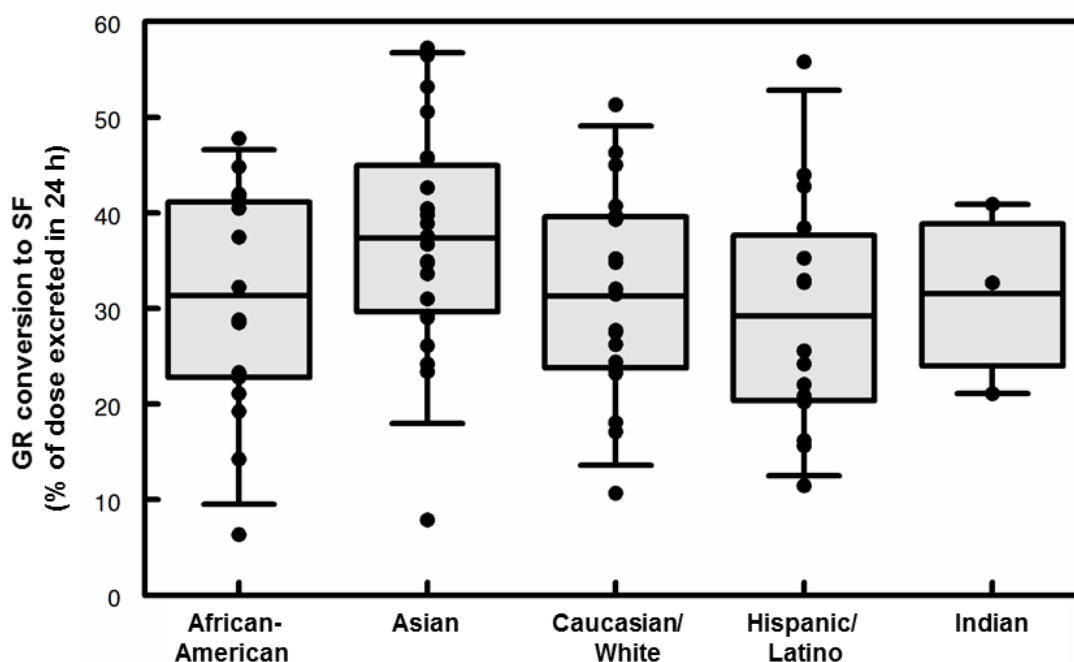

**Figure S3.** Relationship between age and bioavailability. Excretion of sulforaphane (SF) metabolites following a single oral dose of BSE containing glucoraphanin (GR) and active myrosinase.

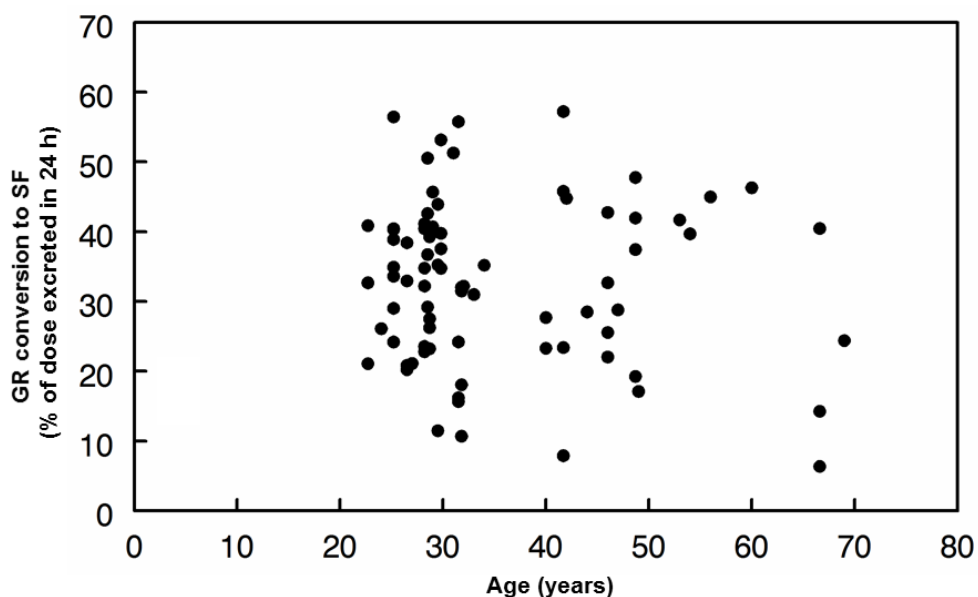

**Figure S4.** Relationship between body mass index (BMI) and bioavailability. Excretion of sulforaphane (SF) metabolites following a single oral dose of BSE containing glucoraphanin (GR) and active myrosinase.

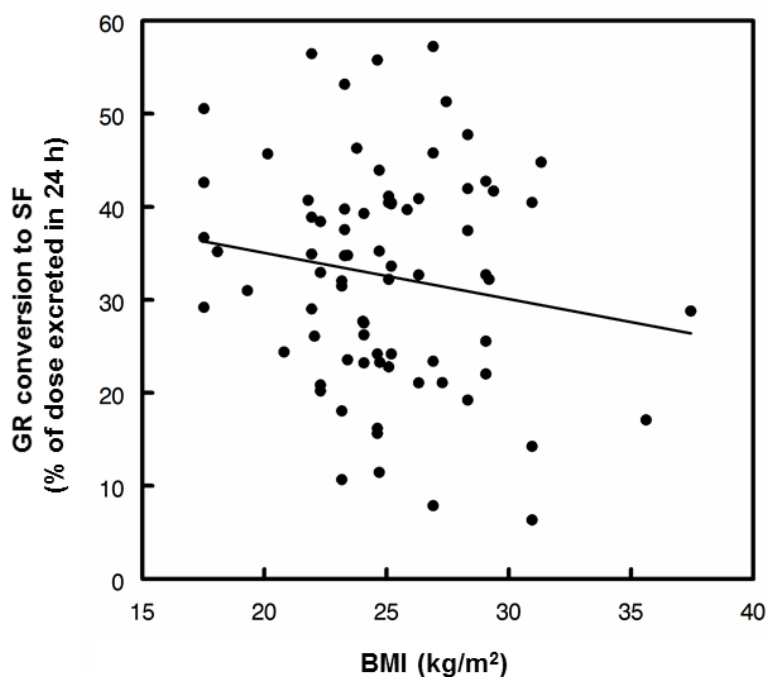

**Figure S5.** Effect of prior self-reported vegetable consumption on 24h. excretion of sulforaphane (SF) metabolites following a single oral dose of BSE containing glucoraphanin (GR) and active myrosinase.

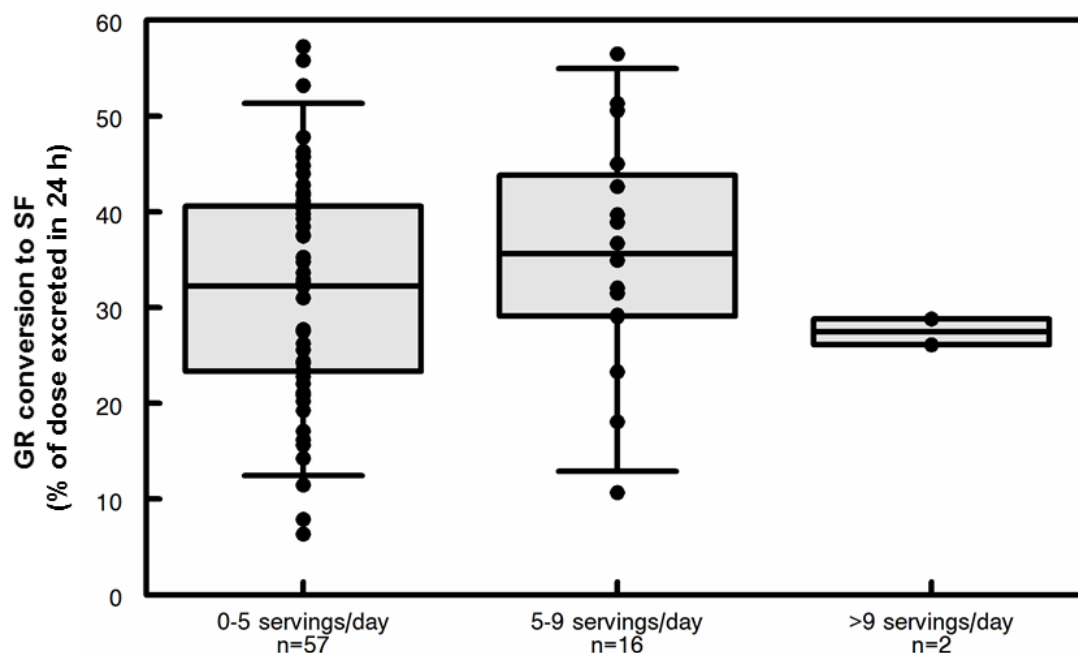

**Figure S6.** Relationship between self-reported (A) bowel movement frequency and (B) bowel movement quality (PPI Phase, only), on 24 h excretion of sulforaphane (SF) metabolites following a single oral dose of BSE containing glucoraphanin (GR) and active myrosinase.

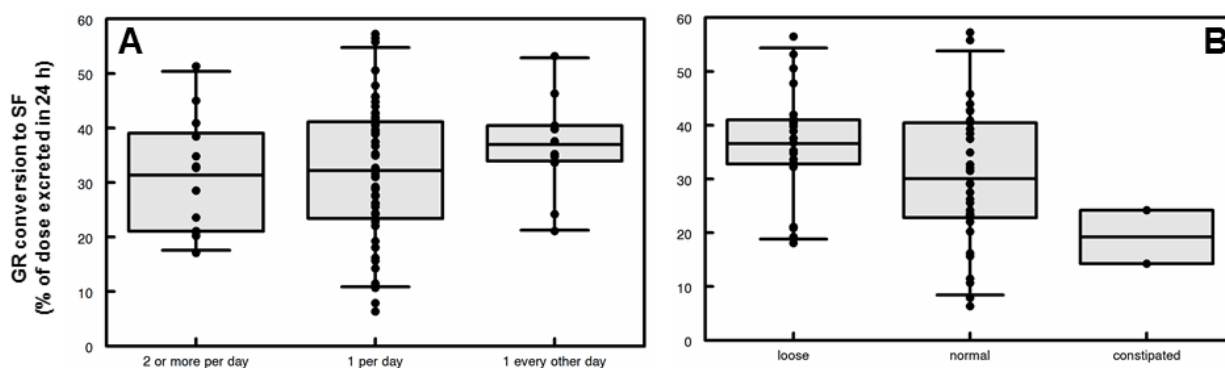



**Figure S7.** Mean gene amplification: 20 genes for each of 16 subjects (with their medication/supplementation status), grouped according to PCA results.

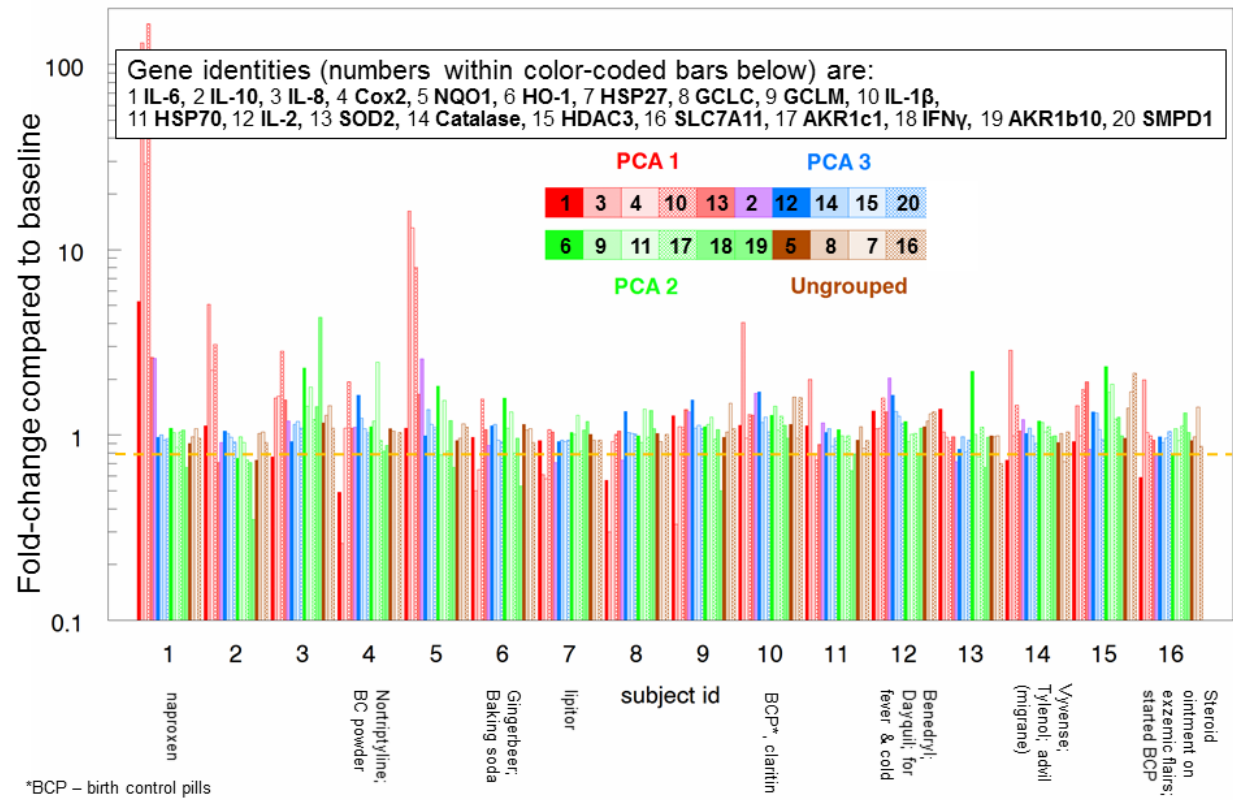

**Figure S8.** Principle components analysis (PCA) on combined PBMC data (computed on mean following single pre- and post-omeprazole delivery of an oral BSE dose containing GR and active myrosinase). Components 1 and 2 explain 58% of variability: Component 1: IL-6, IL-8, IL-10, COX2, IL-1 $\beta$ , SOD2; Component 2: HO-1, GCLM, AKR1c1, IFN $\gamma$ , AKR1b10; HSP70. \*Note that Subject 1 had extraordinarily high IL-1 $\beta$ , IL-8, and COX2 gene expression at both time periods that went into the average values used to create eigenvalues. These 3 genes were all in Component 1 in the PCA analysis.

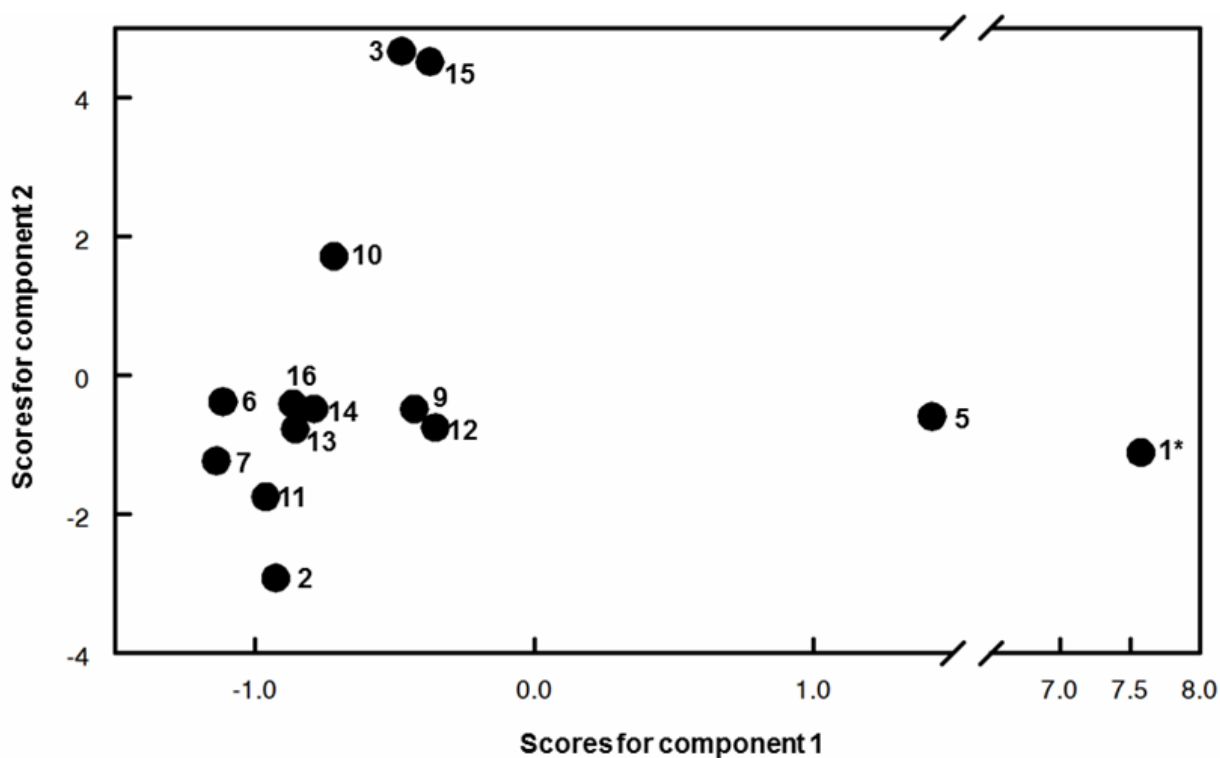

**Figure S9.** Gene amplification and sulforaphane bioavailability. Mean excretion of sulforaphane (SF) metabolites following single pre- to post-omeprazole delivery of an oral dose of BSE containing GR and active myrosinase. Based on individual linear regressions, ' $r$ ' and ' $p$ ' values for correlation between conversion and fold-amplification are provided immediately below the descriptor of each gene. **(A)** Inflammation- & immune-related; **(B)** cytoprotective, detoxifying & antioxidant; **(C)** minor or non-explanatory.

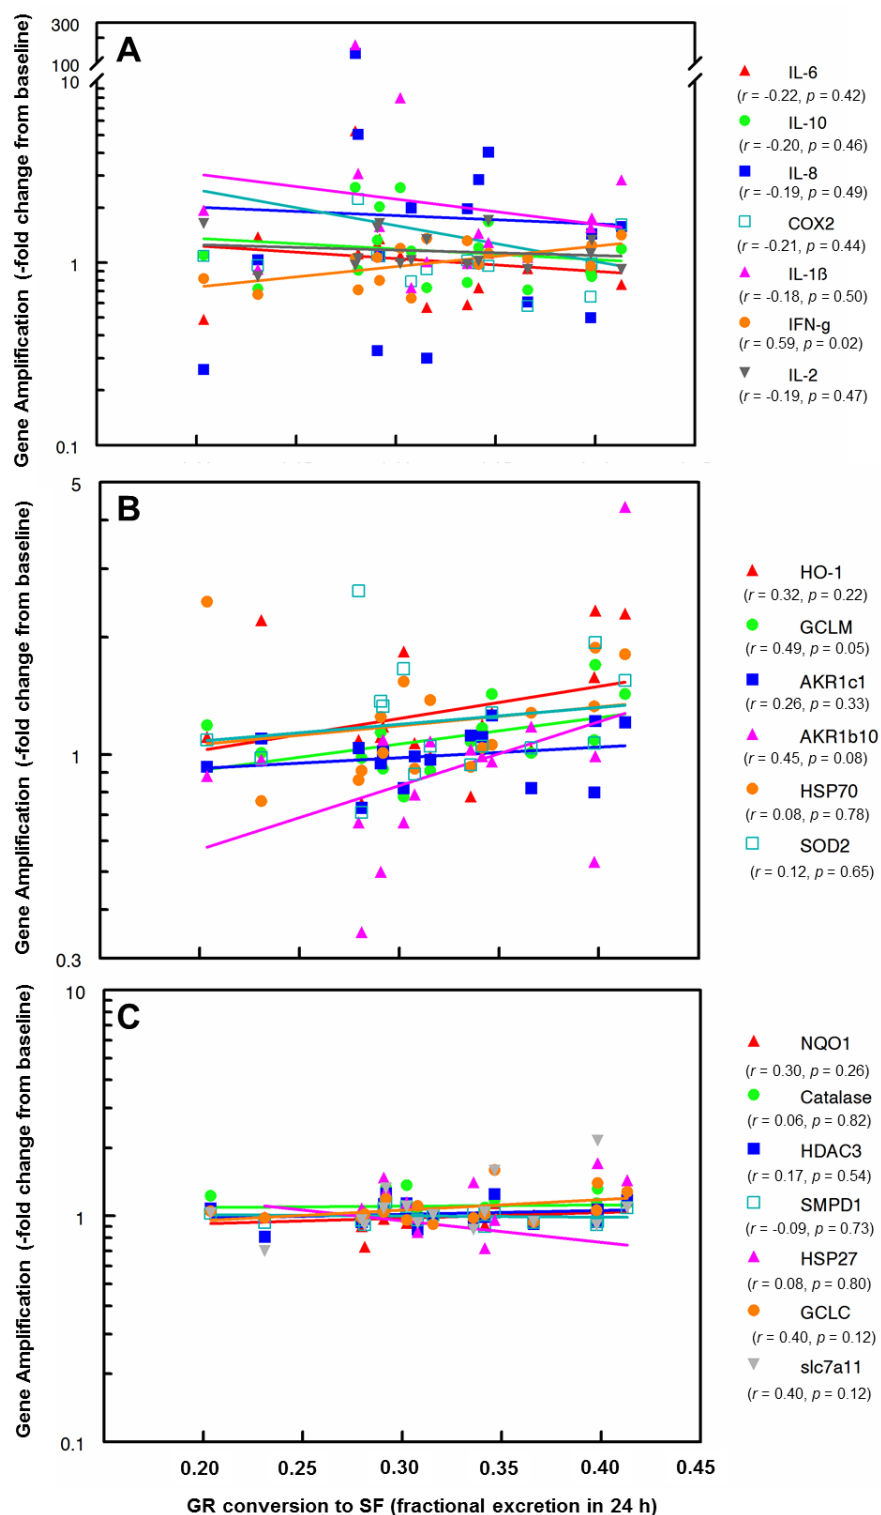

**Figure S10.** PCA loadings and sulforaphane bioavailability by age of subject. PC1(▲), PC2 (●), PC3(■). Loadings for a 67 and a 23 year old subject were not calculated due to missing data.

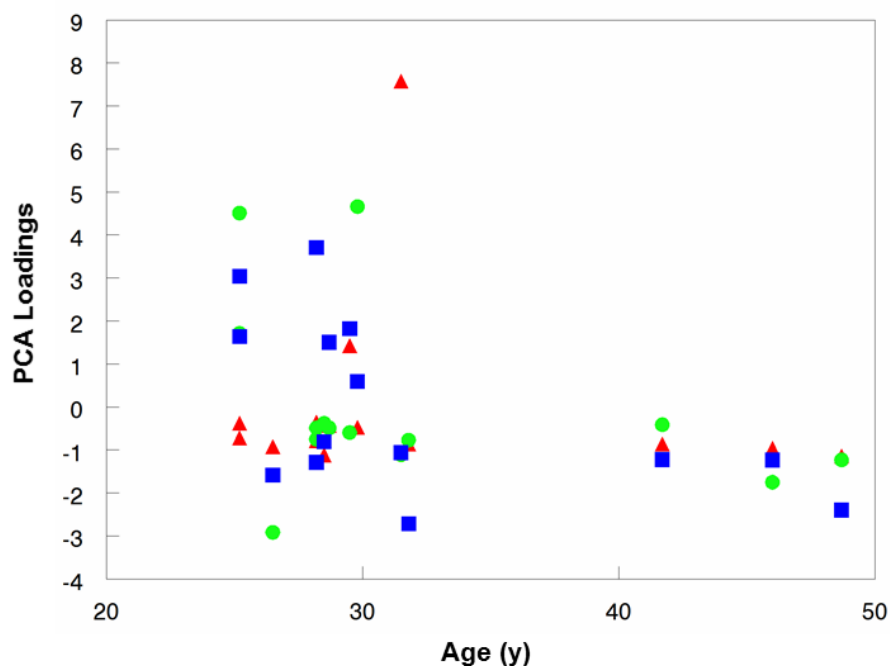

**Figure S11.** PCA loadings and sulforaphane bioavailability by self-identified ethnicity of subject. PC1(▲), PC2 (●), PC3(■). Loadings for one African American and one Indian subject were not calculated due to missing data.

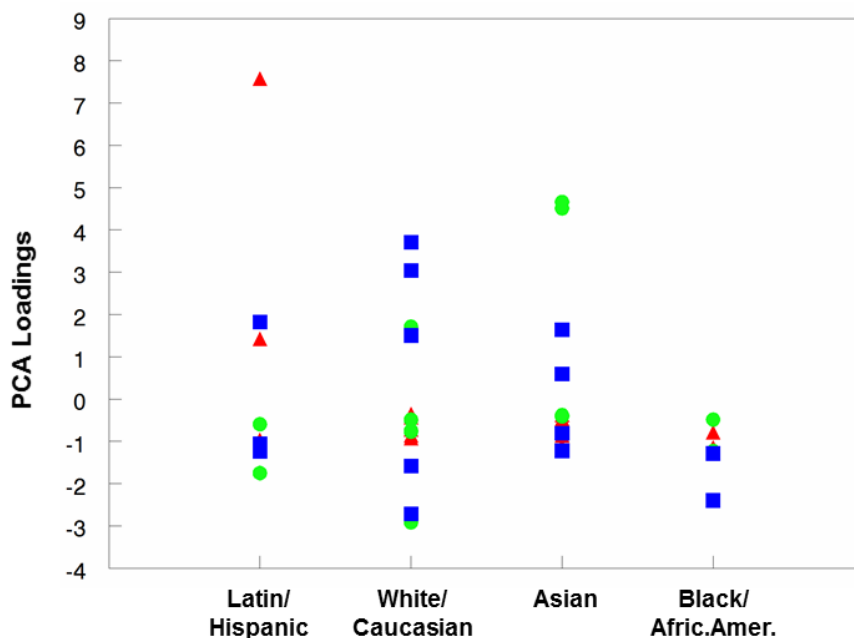

**Figure S12.** PCA loadings and sulforaphane bioavailability by sex of subject. PC1(▲), PC2 (●), PC3(■).

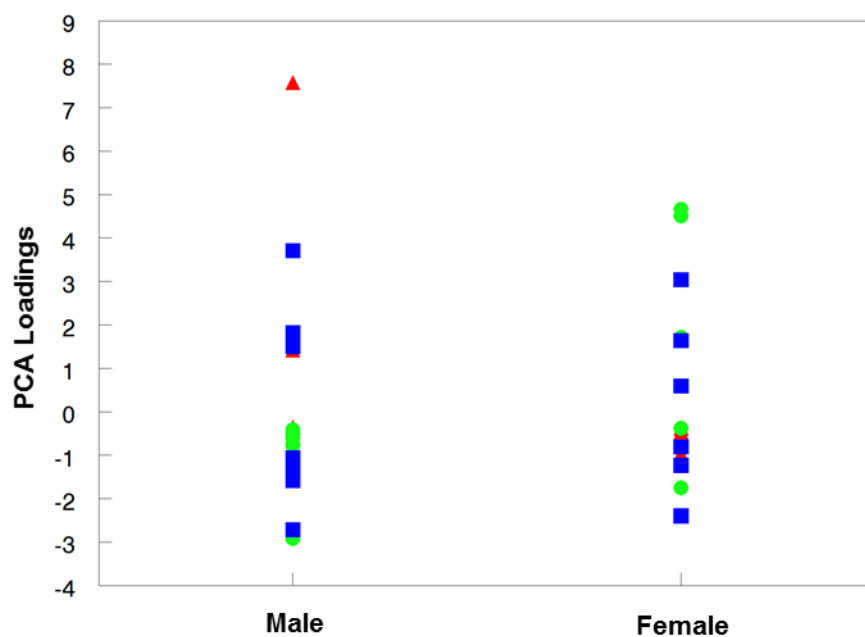

**Figure S13.** PCA loadings and sulforaphane bioavailability by self-identified body mass of subject. PC1(▲), PC2 (●), PC3(■). Loadings for an 86 and a 59 kg subject were not calculated due to missing data.

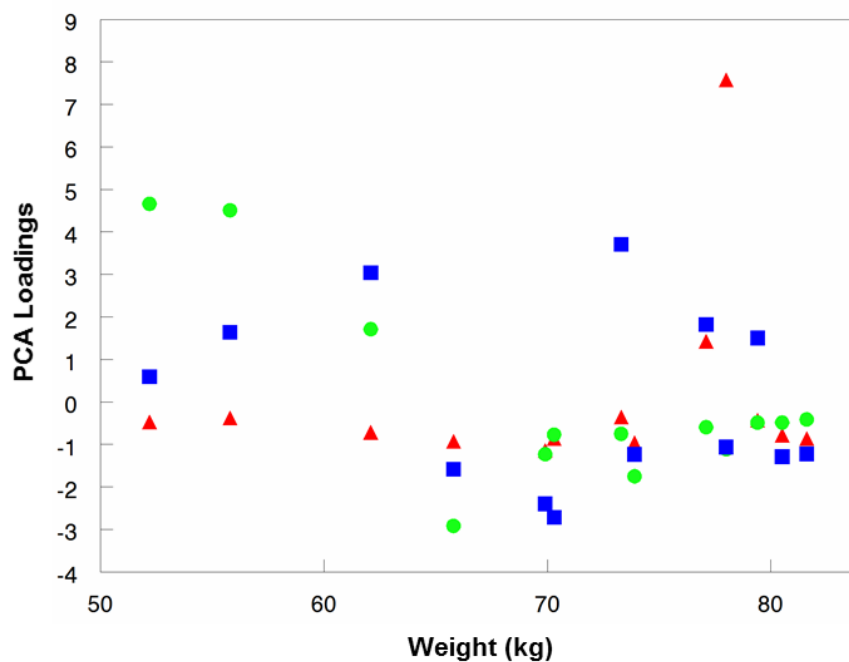

Supplement: s1 [file s1]
